# Supplementary material for: Combined Effects of Lycopene and Metformin on Decreasing Oxidative Stress by Triggering Endogenous Antioxidant Defenses in Diet-Induced Obese Mice
Source: MDPI journal article supplement (doi:10.3390/molecules27238503), 2022-12-03
Supplement: s1 [file s1]

## Supplementary Table

**Table S1.** Compositions of control diet (C) and high-fat diet (HFD).

| <b>Ingredients</b>             | <b>Control diet (C)<br/>(g/100 g)</b> | <b>High-fat diet (HFD)<br/>(g/100 g)</b> |
|--------------------------------|---------------------------------------|------------------------------------------|
| Starch                         | 42.75                                 | 14.95                                    |
| Casein                         | 20                                    | 20                                       |
| Dextrin                        | 13.2                                  | 10                                       |
| Sucrose                        | 10                                    | 10                                       |
| Soy oil                        | 4                                     | 4                                        |
| Lard                           | --                                    | 31                                       |
| Cellulose                      | 5                                     | 5                                        |
| Mix of minerals <sup>(1)</sup> | 3.5                                   | 3.5                                      |
| Mix of vitamins <sup>(2)</sup> | 1                                     | 1                                        |
| L-cystine                      | 0.3                                   | 0.30                                     |
| Choline bitartrate             | 0.25                                  | 0.25                                     |
| Total                          | 100                                   | 100                                      |
| <b>Energy (kcal/100 g)</b>     | <b>385</b>                            | <b>540</b>                               |

<sup>(1)</sup> Mix of minerals: calcium, phosphorus, potassium, magnesium, iron, manganese, selenium, zinc, chromium, nickel, lithium, sulfur, copper, iodine, molybdenum, silicon, chloride, fluoride, boron, and vanadium.

<sup>(2)</sup> Mix of vitamins: nicotinic acid, calcium pantothenate, pyridoxine, thiamine, riboflavin, folic acid, vitamin K, D-biotin, vitamin B12, vitamin A, vitamin D3, vitamin E, and choline.
